# Supplementary material for: Comparative analysis of mitogenomes among three species of grasshoppers (Orthoptera: Acridoidea: Gomphocerinae) and their phylogenetic implications
Source: PeerJ. 2023 Dec 15;11:e16550. doi: 10.7717/peerj.16550 (PMC10726767; doi:10.7717/peerj.16550)
Supplement: Supplemental Information 1 [file peerj-11-16550-s001.xlsx]

## Sheet: Sheet1
Table S1. The best-fit replacement models for the Maximum Likelihood (ML).
Best Model	Genes
GTR+F+R5	nad2, cox2, atp6, cox3, nad3, nad4, nad4L
GTR+F+R4	cox1, cytb, nad1
HKY+F+R4	atp8
TIM+F+R5	nad5
TIM+F+R4	nad6
