# Supplementary material for: Comparative analysis of mitogenomes among three species of grasshoppers (Orthoptera: Acridoidea: Gomphocerinae) and their phylogenetic implications
Source: PeerJ. 2023 Dec 15;11:e16550. doi: 10.7717/peerj.16550 (PMC10726767; doi:10.7717/peerj.16550)
Supplement: Supplemental Information 2 [file peerj-11-16550-s002.xlsx]

## Sheet: Sheet1
Table S2. The best-fit replacement models for the Bayesian Inference (BI).
Best Model	Genes
GTR+F+I+G4	nad2, cox2, cox1, cox3, atp6, nad3, nad5, nad4, nad4L, nad6, cytb, nad1
HKY+F+I+G4	atp8
