# Supplementary material for: Comparative analysis of mitogenomes among three species of grasshoppers (Orthoptera: Acridoidea: Gomphocerinae) and their phylogenetic implications
Source: PeerJ. 2023 Dec 15;11:e16550. doi: 10.7717/peerj.16550 (PMC10726767; doi:10.7717/peerj.16550)
Supplement: Supplemental Information 3 [file peerj-11-16550-s003.xlsx]

## Sheet: Sheet1
Table S3. Codon number and RSCU in the three mitochondrial PCGs.
Dasyhippus peipingensis
Codon	Count	RSCU	Codon	Count	RSCU	Codon	Count	RSCU	Codon	Count	RSCU
UUU(F)	292	1.69	UCU(S)	112	2.4	UAU(Y)	155	1.77	UGU(C)	41	1.95
UUC(F)	53	0.31	UCC(S)	6	0.13	UAC(Y)	20	0.23	UGC(C)	1	0.05
UUA(L)	367	4.23	UCA(S)	130	2.79	UAA(*)	12	1.85	UGA(W)	91	1.8
UUG(L)	42	0.48	UCG(S)	7	0.15	UAG(*)	1	0.15	UGG(W)	10	0.2
CUU(L)	56	0.64	CCU(P)	59	1.77	CAU(H)	58	1.61	CGU(R)	20	1.45
CUC(L)	3	0.03	CCC(P)	1	0.03	CAC(H)	14	0.39	CGC(R)	1	0.07
CUA(L)	48	0.55	CCA(P)	71	2.14	CAA(Q)	61	1.82	CGA(R)	32	2.33
CUG(L)	5	0.06	CCG(P)	2	0.06	CAG(Q)	6	0.18	CGG(R)	2	0.15
AUU(I)	368	1.8	ACU(T)	57	1.19	AAU(N)	143	1.67	AGU(S)	32	0.69
AUC(I)	40	0.2	ACC(T)	11	0.23	AAC(N)	28	0.33	AGC(S)	2	0.04
AUA(M)	222	1.71	ACA(T)	119	2.49	AAA(K)	71	1.48	AGA(S)	82	1.76
AUG(M)	38	0.29	ACG(T)	4	0.08	AAG(K)	25	0.52	AGG(S)	2	0.04
GUU(V)	107	2.38	GCU(A)	72	1.8	GAU(D)	69	1.79	GGU(G)	83	1.57
GUC(V)	6	0.13	GCC(A)	8	0.2	GAC(D)	8	0.21	GGC(G)	4	0.08
GUA(V)	62	1.38	GCA(A)	79	1.98	GAA(E)	69	1.77	GGA(G)	112	2.11
GUG(V)	5	0.11	GCG(A)	1	0.03	GAG(E)	9	0.23	GGG(G)	13	0.25
Average# codons=3730
Myrmeleotettix Palpalis
Codon	Count	RSCU	Codon	Count	RSCU	Codon	Count	RSCU	Codon	Count	RSCU
UUU(F)	298	1.7	UCU(S)	127	2.63	UAU(Y)	147	1.73	UGU(C)	40	1.9
UUC(F)	53	0.3	UCC(S)	8	0.17	UAC(Y)	23	0.27	UGC(C)	2	0.1
UUA(L)	353	4.12	UCA(S)	127	2.63	UAA(*)	11	1.69	UGA(W)	90	1.8
UUG(L)	45	0.53	UCG(S)	3	0.06	UAG(*)	2	0.31	UGG(W)	10	0.2
CUU(L)	55	0.64	CCU(P)	58	1.74	CAU(H)	55	1.53	CGU(R)	20	1.45
CUC(L)	5	0.06	CCC(P)	9	0.27	CAC(H)	17	0.47	CGC(R)	0	0
CUA(L)	51	0.6	CCA(P)	63	1.89	CAA(Q)	56	1.67	CGA(R)	33	2.4
CUG(L)	5	0.06	CCG(P)	3	0.09	CAG(Q)	11	0.33	CGG(R)	2	0.15
AUU(I)	346	1.77	ACU(T)	55	1.15	AAU(N)	143	1.73	AGU(S)	29	0.6
AUC(I)	45	0.23	ACC(T)	10	0.21	AAC(N)	22	0.27	AGC(S)	2	0.04
AUA(M)	232	1.74	ACA(T)	124	2.58	AAA(K)	69	1.48	AGA(S)	86	1.78
AUG(M)	35	0.26	ACG(T)	3	0.06	AAG(K)	24	0.52	AGG(S)	5	0.1
GUU(V)	105	2.35	GCU(A)	74	1.79	GAU(D)	73	1.82	GGU(G)	97	1.8
GUC(V)	4	0.09	GCC(A)	7	0.17	GAC(D)	7	0.17	GGC(G)	5	0.09
GUA(V)	67	1.5	GCA(A)	83	2.01	GAA(E)	68	1.72	GGA(G)	100	1.85
GUG(V)	3	0.07	GCG(A)	1	0.02	GAG(E)	11	0.28	GGG(G)	14	0.26
Average# codons=3731
Aeropedellus prominemarginis
Codon	Count	RSCU	Codon	Count	RSCU	Codon	Count	RSCU	Codon	Count	RSCU
UUU(F)	292	1.7	UCU(S)	113	2.4	UAU(Y)	158	1.8	UGU(C)	37	1.85
UUC(F)	51	0.3	UCC(S)	9	0.19	UAC(Y)	18	0.2	UGC(C)	3	0.15
UUA(L)	360	4.13	UCA(S)	127	2.7	UAA(*)	12	1.85	UGA(W)	85	1.7
UUG(L)	41	0.47	UCG(S)	6	0.13	UAG(*)	1	0.15	UGG(W)	15	0.3
CUU(L)	50	0.57	CCU(P)	61	1.83	CAU(H)	56	1.58	CGU(R)	20	1.43
CUC(L)	9	0.1	CCC(P)	2	0.06	CAC(H)	15	0.42	CGC(R)	2	0.14
CUA(L)	59	0.68	CCA(P)	69	2.08	CAA(Q)	62	1.85	CGA(R)	29	2.07
CUG(L)	4	0.05	CCG(P)	1	0.03	CAG(Q)	5	0.15	CGG(R)	5	0.36
AUU(I)	346	1.78	ACU(T)	61	1.25	AAU(N)	134	1.6	AGU(S)	30	0.64
AUC(I)	43	0.22	ACC(T)	13	0.27	AAC(N)	33	0.4	AGC(S)	2	0.04
AUA(M)	216	1.68	ACA(T)	117	2.4	AAA(K)	73	1.54	AGA(S)	84	1.79
AUG(M)	41	0.32	ACG(T)	4	0.08	AAG(K)	22	0.46	AGG(S)	5	0.11
GUU(V)	120	2.44	GCU(A)	65	1.62	GAU(D)	69	1.73	GGU(G)	85	1.59
GUC(V)	6	0.12	GCC(A)	13	0.33	GAC(D)	11	0.28	GGC(G)	2	0.04
GUA(V)	66	1.34	GCA(A)	80	2	GAA(E)	70	1.79	GGA(G)	114	2.13
GUG(V)	5	0.1	GCG(A)	2	0.05	GAG(E)	8	0.21	GGG(G)	13	0.24
Average# codons=3730
