# Supplementary material for: Comparative analysis of mitogenomes among three species of grasshoppers (Orthoptera: Acridoidea: Gomphocerinae) and their phylogenetic implications
Source: PeerJ. 2023 Dec 15;11:e16550. doi: 10.7717/peerj.16550 (PMC10726767; doi:10.7717/peerj.16550)
Supplement: Supplemental Information 4 [file peerj-11-16550-s004.xlsx]

## Sheet: Sheet1
Table S4. The evolutionary rate of each PCGs in the mitogenomes of 10 gomphocerine species.
Sequence	Ka	Ks	Ka/Ks
ATP6	0.0564162	0.400491	0.140868
ATP8	0.0878643	0.494653	0.177628
COX1	0.0284921	0.495389	0.0575146
COX2	0.050755	0.465032	0.109143
COX3	0.0470657	0.434693	0.108273
CYTB	0.037014	0.532746	0.0694777
ND1	0.0499228	0.337202	0.14805
ND2	0.0883534	0.526015	0.167967
ND3	0.0606061	0.386974	0.156616
ND4	0.0592999	0.363305	0.163224
ND4L	0.0473882	0.306796	0.154462
ND5	0.0586976	0.339348	0.172972
ND6	0.0980226	0.335061	0.292552
